# Supplementary material for: Unique intermolecular reaction of simple porphyrins at a metal surface gives covalent nanostructures
Source: Royal Society of Chemistry journal article supplement (doi:10.1039/b718865j), 2008-01-01
Supplement: b718865j.pdf [file b718865j.pdf]

## Supporting Information

**a)RAIRS of Tetra(mesityl)porphyrin (1) on Cu(110), 300K**

**b)RAIRS of Tetraphenylporphyrin on Cu(110), 300K**

5 **Both sets of data show a close correspondence to data obtained from pressed KBr discs of the original porphyrin**

10

15

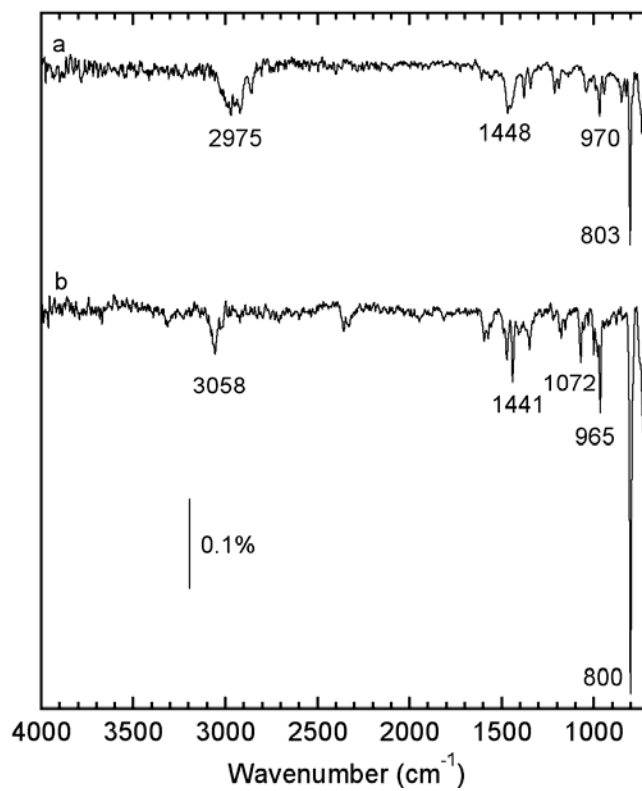

**High coverage STM image**

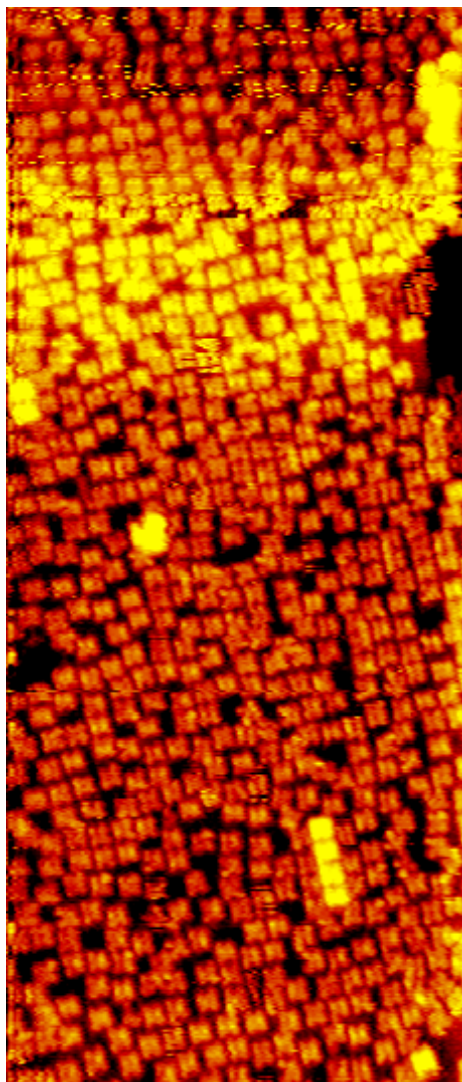

STM image (50 x 90 nm) of **1** at high coverage on Cu(110)

Laser Desorption-Ionisation Time of Flight Mass Spectrometry (LDI-TOF MS)

25

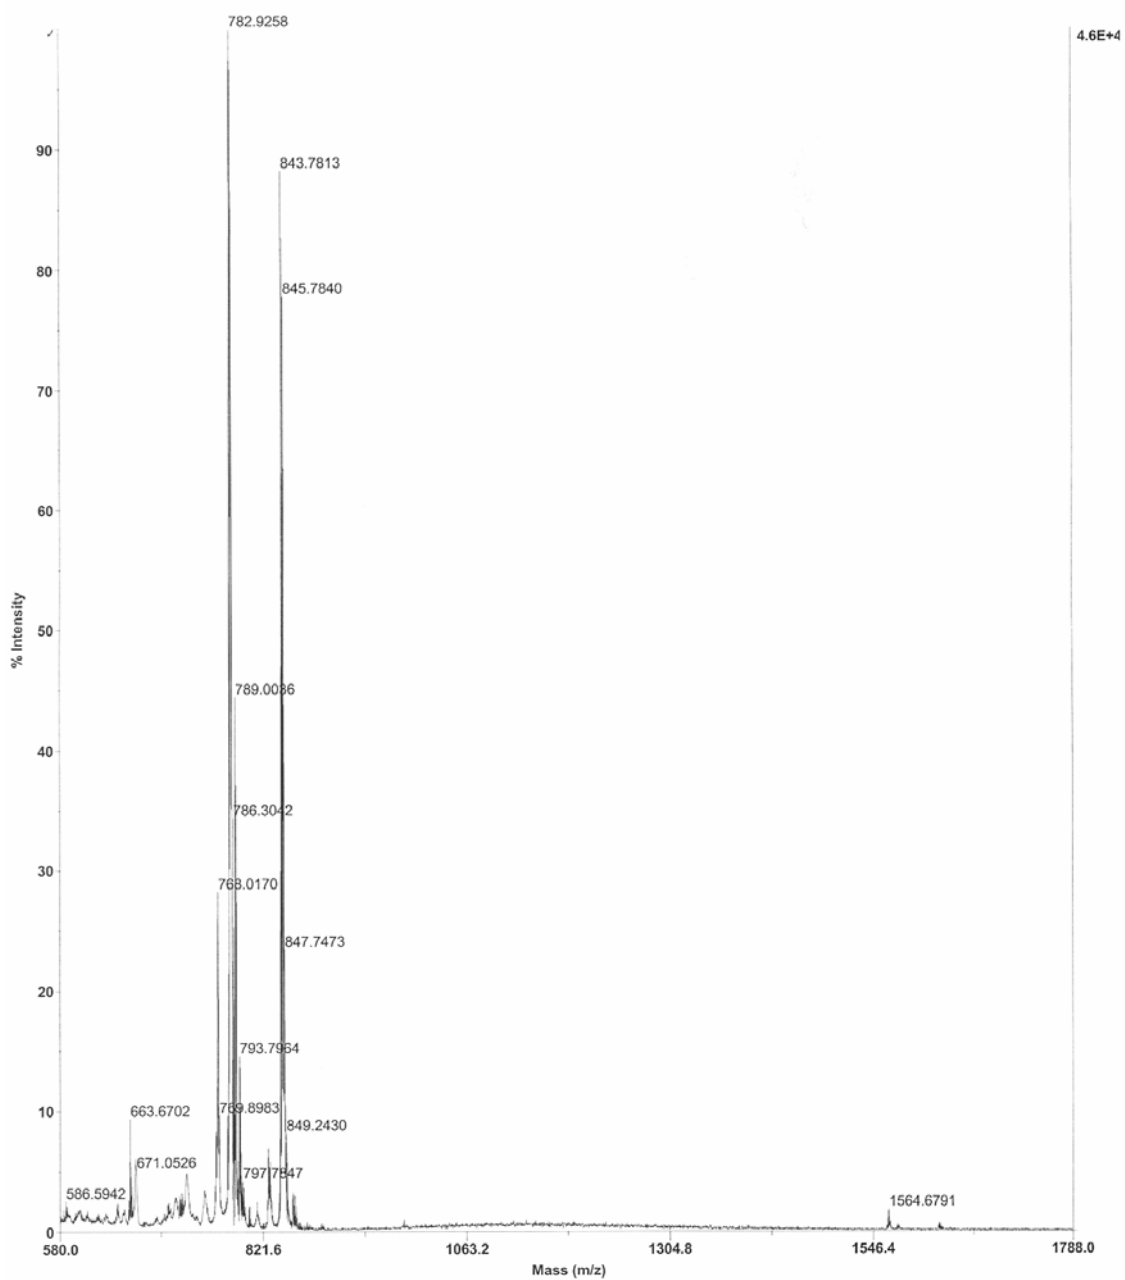

LDI-TOF MS in positive mode of a sample of **1** heated with a large excess of copper turnings at 180°C.

30

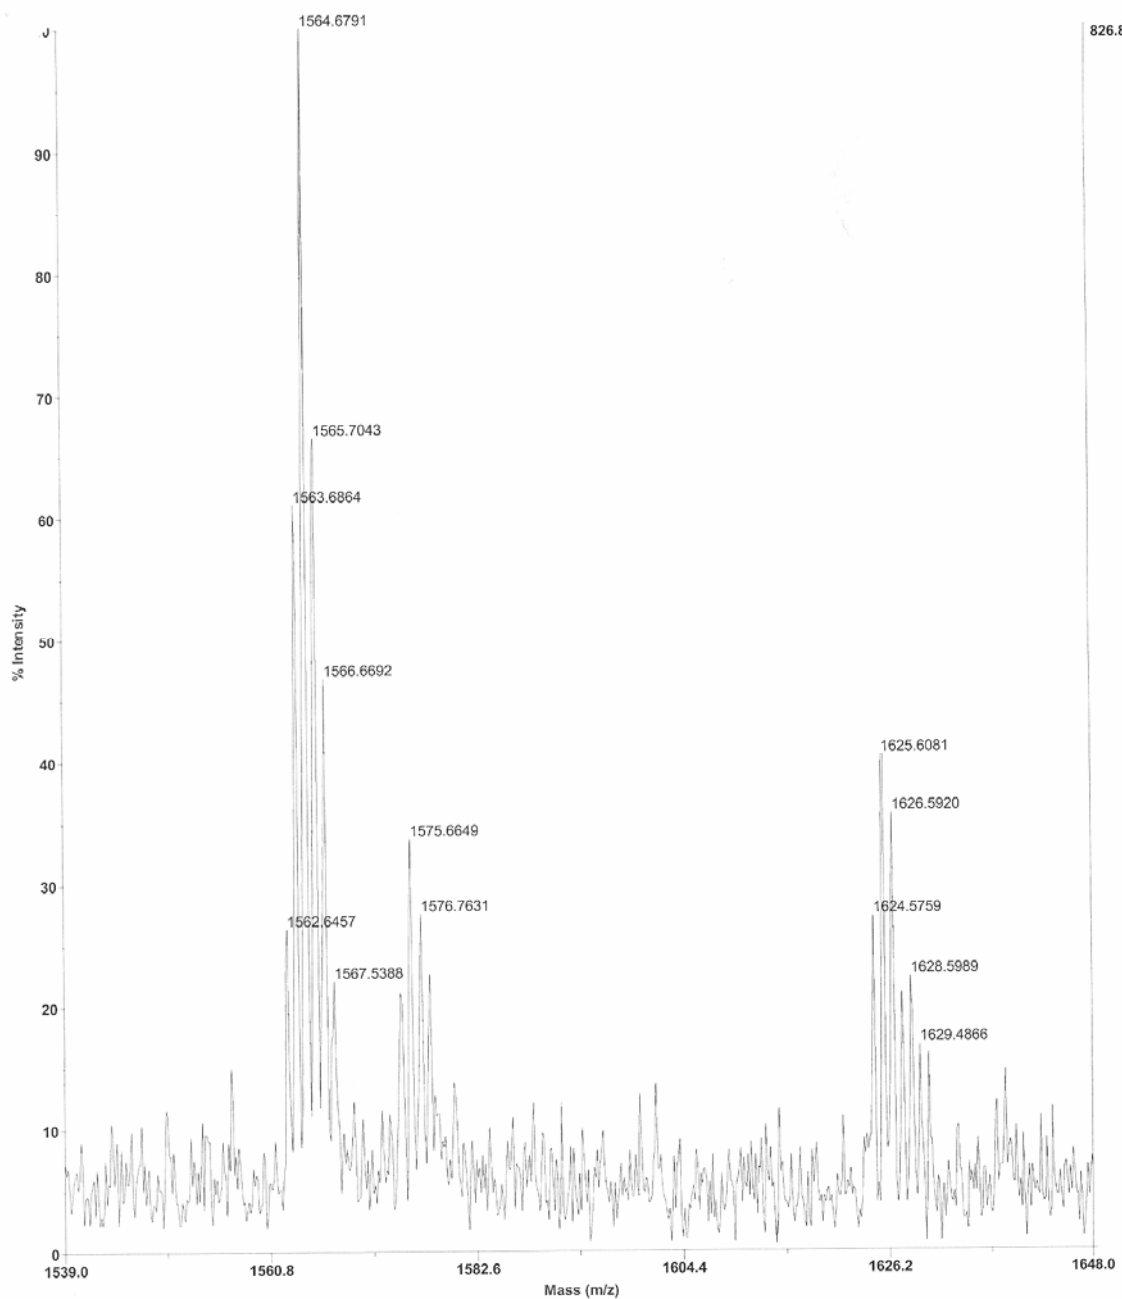

LDI-TOF MS in positive mode of a sample of **1** heated with a large excess of copper turnings at 180°C.

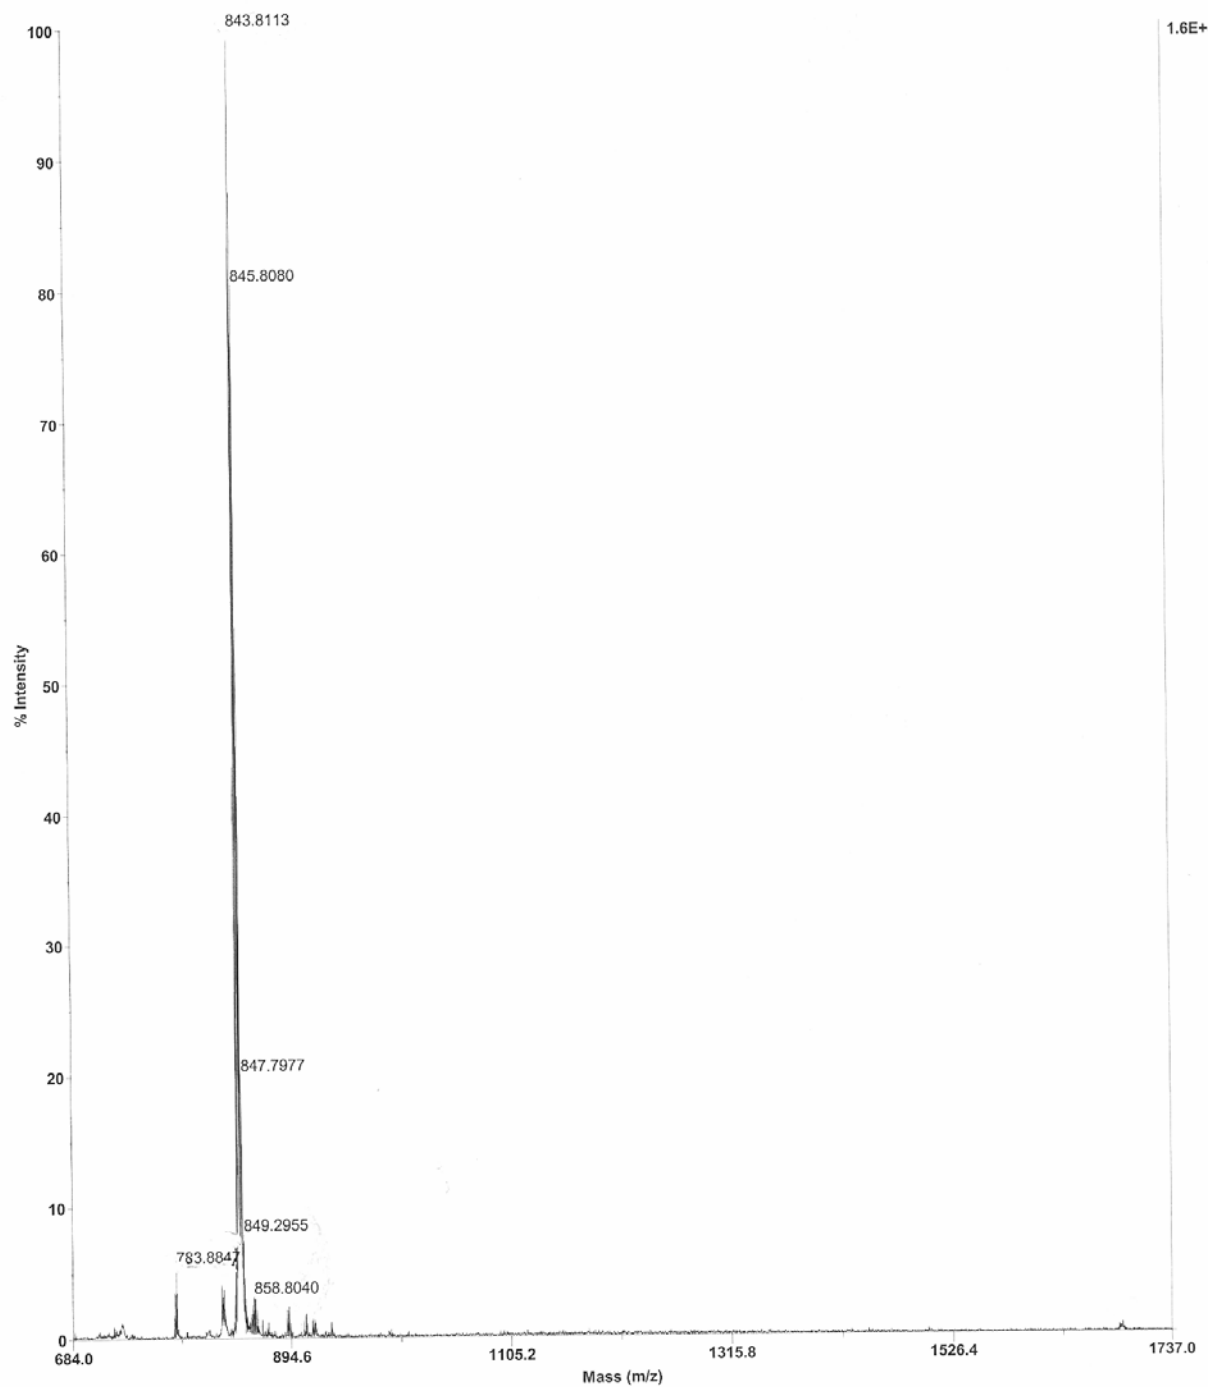

35

LDI-TOF MS in positive mode of a sample of **1** heated with a large excess of copper turnings in DMF at 100°C.
